## Authors' Closure

The authors would like to thank Mr. Scott Bair and Professor Winer on their discussion of our paper. We are familiar with the work conducted by Bair and Winer and the limiting stress observed in their concentric cylinder rheometer. The work conducted and presented in our paper was to develop a

flexible model to investigate thermal effects in EHD lubrication for a non-Newtonian fluid model. Therefore, we chose the Eyring rheological model for our analysis. However, the computer model was developed to have the flexibility of accepting different rheological model. We are currently working on implementing different rheological fluid models into our program. We will be reporting our finding on the nonlinear viscoelastic model and Bair and Winer's modeling in the near future.
